# Supplementary material
Source: publisher site journal article supplement (https://static.cambridge.org/content/id/urn:cambridge.org:id:article:S0003581520000050/resource/name/S0003581520000050supp001.pdf)
Supplement: Supplementary file 1 [file S0003581520000050supp001.pdf]

# SUPPLEMENTARY MATERIAL

## *APPENDIX SM1*

to be read in conjunction with

‘The Timber Lodgings of King Henry VIII:  
ephemeral architecture at war in the early sixteenth century’  
by Alden Gregory,

published in vol **100** (2020) of the *Antiquaries Journal*

Alden Gregory, Apt. 25 Hampton Court Palace, East Molesey, Surrey, KT8 9AU, UK. Email:  
[alden.gregory@hrp.org.uk](mailto:alden.gregory@hrp.org.uk)

## SUPPLEMENTARY MATERIAL

**APPENDIX SM1** SURREY HISTORY CENTRE, WOKING, LM/4: ‘THE KYNG[ES]  
LODGYNG[ES] MADE OF TYMBRE AND PAYNTED LYCK BRYCKWORK’,  
AS INVENTORIED IN 1542

## APPENDIX SM1

### SURREY HISTORY CENTRE, WOKING, LM/4: ‘THE KYNG[ES] LODGYNG[ES] MADE OF TYMBRE AND PAYNTED LYCK BRYCKWORK’, AS INVENTORIED IN 1542

*A second, identically worded, copy of this inventory is also recorded in Surrey History Centre, LM/48.*

#### THE KYNG[ES] LODGYNG[ES] MADE OF TYMBRE AND PAYNTED LYCK BRYCKWORK

Fyrst two ground plat[es] and two reason pec[es] w[i]th a crowne pece eche of them cont in lengthe 24 foot[es]

Itm 5 shorte plat[es] eche of the[m] cont in length 12 fote

Itm 4 beamys eche of them cont in lengthe 12 fote

Itm 12 post[es] eche of them cont 7 fot 2 inchis long

Itm 4 mounte pec[es] eche of them cont 5 fote long

Itm 8 rafters eche of them cont 8 fote long

Itm 18 rof panell[es] eche of the[m] cont 8 fote long & 3 fote brode

Itm 20 wall panell[es] eche of the[m] of the cont 8 fot long & 3 fot[es] 4 inches di [3ft 4.5in] brode

Itm 4 panell[es] for gable end[es] eche of them cont 5 fote long & 5 fot di [5.5ft] brode

#### THE SECONDE CHAMBRE

Fyrst two ground plat[es] eche of the[m] cont in lengthe 16 fot[es]

Itm 3 shorte plat[es] eche of the[m] cont 12 fote long

Itm 2 reason pec[es] eche of them cont 16 fot long

Itm 3 beamys eche of them cont 12 fote long

Itm 5 post[es] eche of them cont 7 fot[es] 2 inchis long

Itm a crowne pece cont in length 16 fot

Itm 4 mount pec[es] to bere the rof eche of them cont 4 fot di [4.5ft] long

Itm 4 rafters eche of them cont 8 fote long

Itm 12 panell[es] for wall[es] che of them cont 7 fot long & 3 fot 10 inchis brode

Itm 12 panell[es] for cov[er]ing eche of them cont 8 fote long & 3 fote brode

Itm 4 panell[es] for 2 gable endys eche of them 4 long & 5 fot di [5.5ft] brode

Itm 3 panell[es] for the flo[or] eche of the[m] cont 12 fot long & 2 fot 8 inchis brode

Itm 5 joyst[es] for the flo[or] eche of them cont 12 fote long

Itm 4 benchis w[i]th fete of Irone eche of them cont 7 fote long

Itm 2 chymneys of irone with one mantell pece of Irone with a flo[wer] deluce lacking platt[es] for the harthes of the seyd chymneys & one of the fote barres and also the vic[es] & jawmes for the mantell of the same chymney
